# Supplementary material
Source: PubMed Central journal article supplement (PMC4827074)
Supplement: EXCLI-12-885-s-001.pdf [file EXCLI-12-885-s-001.pdf]

**Supplementary material to:**

**MACHINE LEARNING APPROACHES FOR DISCERNING  
 INTERCORRELATION OF HEMATOLOGICAL PARAMETERS AND  
 GLUCOSE LEVEL FOR IDENTIFICATION OF DIABETES MELLITUS**

Apilak Worachartcheewan<sup>1</sup>, Chanin Nantasenamat<sup>1,2\*</sup>, Pisit Prasertsrithong<sup>2</sup>,  
 Jakraphob Amranan<sup>2</sup>, Teerawat Monnor<sup>1</sup>, Tassaneya Chaisatit<sup>3</sup>,  
 Wilairat Nuchpramool<sup>3</sup>, Virapong Prachayasittikul<sup>2\*</sup>

**Contents of supporting information**

The following supplementary tables describe rules derived from association analysis for the three groups of samples stratified by their glycemc levels into normal, pre-DM and DM groups.

**Table S1:** Association rules for normal group

**Table S2:** Association rules for Pre-DM group

**Table S3:** Association rules for DM group

**Table S1:** Association rules for normal group

| Rule | Antecedent                                         | Consequent | Support (%) | Confidence (%) |
|------|----------------------------------------------------|------------|-------------|----------------|
| 1    | TG = TG_2 and glucose = gluc_1                     | Normal     | 7.89        | 100.00         |
| 2    | LDL = LDL_4 and glucose = gluc_1                   | Normal     | 10.00       | 100.00         |
| 3    | chol = chol_3 and glucose = gluc_1                 | Normal     | 11.05       | 100.00         |
| 4    | RBC = RBC_3 and glucose = gluc_1                   | Normal     | 10.53       | 100.00         |
| 5    | WBC = WBC_4 and glucose = gluc_1                   | Normal     | 9.47        | 100.00         |
| 6    | LDL = LDL_3 and WBC = WBC_1                        | Normal     | 5.79        | 100.00         |
| 7    | LDL = LDL_3 and glucose = gluc_1                   | Normal     | 14.21       | 100.00         |
| 8    | Hb = Hb_3 and glucose = gluc_1                     | Normal     | 14.21       | 100.00         |
| 9    | Hct = Hct_4 and glucose = gluc_1                   | Normal     | 12.63       | 100.00         |
| 10   | Hb = Hb_4 and glucose = gluc_1                     | Normal     | 12.11       | 100.00         |
| 11   | WBC = WBC_2 and glucose = gluc_1                   | Normal     | 14.21       | 100.00         |
| 12   | Hct = Hct_3 and glucose = gluc_1                   | Normal     | 15.26       | 100.00         |
| 13   | Hct = Hct_2 and glucose = gluc_1                   | Normal     | 15.26       | 100.00         |
| 14   | RBC = RBC_1 and glucose = gluc_1                   | Normal     | 13.68       | 100.00         |
| 15   | WBC = WBC_3 and glucose = gluc_1                   | Normal     | 13.68       | 100.00         |
| 16   | Hb = Hb_2 and glucose = gluc_1                     | Normal     | 17.37       | 100.00         |
| 17   | chol = chol_2 and glucose = gluc_1                 | Normal     | 17.37       | 100.00         |
| 18   | RBC = RBC_2 and glucose = gluc_1                   | Normal     | 18.95       | 100.00         |
| 19   | LDL = LDL_2 and glucose = gluc_1                   | Normal     | 17.89       | 100.00         |
| 20   | TG = TG_2 and glucose = gluc_1 and HDL = HDL_2     | Normal     | 5.26        | 100.00         |
| 21   | LDL = LDL_4 and chol = chol_3 and glucose = gluc_1 | Normal     | 8.42        | 100.00         |
| 22   | LDL = LDL_4 and Hct = Hct_4 and glucose = gluc_1   | Normal     | 5.26        | 100.00         |

| Rule | Antecedent                                         | Consequent | Support (%) | Confidence (%) |
|------|----------------------------------------------------|------------|-------------|----------------|
| 23   | LDL = LDL_4 and glucose = gluc_1 and HDL = HDL_2   | Normal     | 8.42        | 100.00         |
| 24   | LDL = LDL_4 and glucose = gluc_1 and TG = TG_1     | Normal     | 5.26        | 100.00         |
| 25   | chol = chol_3 and Hct = Hct_4 and glucose = gluc_1 | Normal     | 5.79        | 100.00         |
| 26   | chol = chol_3 and Hb = Hb_4 and glucose = gluc_1   | Normal     | 5.26        | 100.00         |
| 27   | chol = chol_3 and glucose = gluc_1 and HDL = HDL_2 | Normal     | 10.00       | 100.00         |
| 28   | chol = chol_3 and glucose = gluc_1 and TG = TG_1   | Normal     | 5.79        | 100.00         |
| 29   | RBC = RBC_4 and Hct = Hct_4 and glucose = gluc_1   | Normal     | 6.84        | 100.00         |
| 30   | RBC = RBC_4 and chol = chol_2 and glucose = gluc_1 | Normal     | 5.26        | 100.00         |
| 31   | RBC = RBC_3 and Hb = Hb_4 and glucose = gluc_1     | Normal     | 5.26        | 100.00         |
| 32   | RBC = RBC_3 and chol = chol_2 and glucose = gluc_1 | Normal     | 5.26        | 100.00         |
| 33   | RBC = RBC_3 and glucose = gluc_1 and HDL = HDL_2   | Normal     | 8.95        | 100.00         |
| 34   | RBC = RBC_3 and glucose = gluc_1 and TG = TG_1     | Normal     | 7.37        | 100.00         |
| 35   | WBC = WBC_4 and chol = chol_1 and glucose = gluc_1 | Normal     | 6.32        | 100.00         |
| 36   | WBC = WBC_4 and glucose = gluc_1 and HDL = HDL_2   | Normal     | 6.32        | 100.00         |
| 37   | WBC = WBC_4 and glucose = gluc_1 and TG = TG_1     | Normal     | 5.26        | 100.00         |
| 38   | LDL = LDL_3 and Hct = Hct_3 and glucose = gluc_1   | Normal     | 5.26        | 100.00         |
| 39   | LDL = LDL_3 and WBC = WBC_1 and glucose = gluc_1   | Normal     | 5.79        | 100.00         |
| 40   | LDL = LDL_3 and WBC = WBC_1 and TG = TG_1          | Normal     | 5.79        | 100.00         |
| 41   | LDL = LDL_3 and chol = chol_2 and glucose = gluc_1 | Normal     | 11.58       | 100.00         |
| 42   | LDL = LDL_3 and glucose = gluc_1 and HDL = HDL_2   | Normal     | 10.00       | 100.00         |
| 43   | LDL = LDL_3 and glucose = gluc_1 and TG = TG_1     | Normal     | 11.58       | 100.00         |
| 44   | Hb = Hb_3 and Hct = Hct_3 and glucose = gluc_1     | Normal     | 11.05       | 100.00         |
| 45   | Hb = Hb_3 and WBC = WBC_1 and glucose = gluc_1     | Normal     | 5.26        | 100.00         |
| 46   | Hb = Hb_3 and chol = chol_2 and glucose = gluc_1   | Normal     | 5.79        | 100.00         |
| 47   | Hb = Hb_3 and RBC = RBC_2 and glucose = gluc_1     | Normal     | 5.79        | 100.00         |
| 48   | Hb = Hb_3 and LDL = LDL_2 and glucose = gluc_1     | Normal     | 5.79        | 100.00         |
| 49   | Hb = Hb_3 and chol = chol_1 and glucose = gluc_1   | Normal     | 7.37        | 100.00         |
| 50   | Hb = Hb_3 and glucose = gluc_1 and HDL = HDL_2     | Normal     | 8.95        | 100.00         |
| 51   | Hb = Hb_3 and glucose = gluc_1 and TG = TG_1       | Normal     | 10.53       | 100.00         |
| 52   | Hct = Hct_4 and Hb = Hb_4 and glucose = gluc_1     | Normal     | 10.53       | 100.00         |
| 53   | Hct = Hct_4 and chol = chol_2 and glucose = gluc_1 | Normal     | 5.26        | 100.00         |
| 54   | Hct = Hct_4 and glucose = gluc_1 and HDL = HDL_2   | Normal     | 10.00       | 100.00         |
| 55   | Hct = Hct_4 and glucose = gluc_1 and TG = TG_1     | Normal     | 8.95        | 100.00         |
| 56   | Hb = Hb_4 and WBC = WBC_2 and glucose = gluc_1     | Normal     | 5.26        | 100.00         |
| 57   | Hb = Hb_4 and glucose = gluc_1 and HDL = HDL_2     | Normal     | 9.47        | 100.00         |
| 58   | Hb = Hb_4 and glucose = gluc_1 and TG = TG_1       | Normal     | 9.47        | 100.00         |
| 59   | WBC = WBC_2 and RBC = RBC_2 and glucose = gluc_1   | Normal     | 5.26        | 100.00         |
| 60   | WBC = WBC_2 and sex = M and glucose = gluc_1       | Normal     | 6.32        | 100.00         |
| 61   | WBC = WBC_2 and chol = chol_1 and glucose = gluc_1 | Normal     | 5.79        | 100.00         |
| 62   | WBC = WBC_2 and glucose = gluc_1 and HDL = HDL_2   | Normal     | 12.11       | 100.00         |
| 63   | WBC = WBC_2 and glucose = gluc_1 and TG = TG_1     | Normal     | 10.53       | 100.00         |
| 64   | Hct = Hct_3 and chol = chol_2 and glucose = gluc_1 | Normal     | 6.32        | 100.00         |
| 65   | Hct = Hct_3 and RBC = RBC_2 and glucose = gluc_1   | Normal     | 5.79        | 100.00         |
| 66   | Hct = Hct_3 and LDL = LDL_2 and glucose = gluc_1   | Normal     | 6.32        | 100.00         |

| Rule | Antecedent                                         | Consequent | Support (%) | Confidence (%) |
|------|----------------------------------------------------|------------|-------------|----------------|
| 67   | Hct = Hct_3 and sex = M and glucose = gluc_1       | Normal     | 5.26        | 100.00         |
| 68   | Hct = Hct_3 and chol = chol_1 and glucose = gluc_1 | Normal     | 7.89        | 100.00         |
| 69   | Hct = Hct_3 and glucose = gluc_1 and HDL = HDL_2   | Normal     | 10.53       | 100.00         |
| 70   | Hct = Hct_3 and glucose = gluc_1 and TG = TG_1     | Normal     | 11.58       | 100.00         |
| 71   | Hct = Hct_1 and RBC = RBC_1 and glucose = gluc_1   | Normal     | 8.42        | 100.00         |
| 72   | Hct = Hct_1 and LDL = LDL_2 and glucose = gluc_1   | Normal     | 5.26        | 100.00         |
| 73   | Hct = Hct_2 and Hb = Hb_2 and glucose = gluc_1     | Normal     | 12.11       | 100.00         |
| 74   | Hct = Hct_2 and WBC = WBC_1 and glucose = gluc_1   | Normal     | 6.84        | 100.00         |
| 75   | Hct = Hct_2 and LDL = LDL_1 and glucose = gluc_1   | Normal     | 6.84        | 100.00         |
| 76   | Hct = Hct_2 and RBC = RBC_2 and glucose = gluc_1   | Normal     | 8.95        | 100.00         |
| 77   | Hct = Hct_2 and sex = M and glucose = gluc_1       | Normal     | 5.79        | 100.00         |
| 78   | Hct = Hct_2 and chol = chol_1 and glucose = gluc_1 | Normal     | 9.47        | 100.00         |
| 79   | Hct = Hct_2 and glucose = gluc_1 and HDL = HDL_2   | Normal     | 12.63       | 100.00         |
| 80   | Hct = Hct_2 and glucose = gluc_1 and TG = TG_1     | Normal     | 13.16       | 100.00         |
| 81   | Hb = Hb_1 and RBC = RBC_1 and glucose = gluc_1     | Normal     | 6.84        | 100.00         |
| 82   | Hb = Hb_1 and LDL = LDL_2 and glucose = gluc_1     | Normal     | 5.79        | 100.00         |
| 83   | RBC = RBC_1 and Hb = Hb_2 and glucose = gluc_1     | Normal     | 5.79        | 100.00         |
| 84   | RBC = RBC_1 and WBC = WBC_1 and glucose = gluc_1   | Normal     | 5.79        | 100.00         |
| 85   | RBC = RBC_1 and LDL = LDL_1 and glucose = gluc_1   | Normal     | 6.84        | 100.00         |
| 86   | RBC = RBC_1 and chol = chol_1 and glucose = gluc_1 | Normal     | 9.47        | 100.00         |
| 87   | RBC = RBC_1 and glucose = gluc_1 and HDL = HDL_2   | Normal     | 12.11       | 100.00         |
| 88   | RBC = RBC_1 and glucose = gluc_1 and TG = TG_1     | Normal     | 11.58       | 100.00         |
| 89   | WBC = WBC_3 and chol = chol_2 and glucose = gluc_1 | Normal     | 5.26        | 100.00         |
| 90   | WBC = WBC_3 and LDL = LDL_2 and glucose = gluc_1   | Normal     | 5.26        | 100.00         |
| 91   | WBC = WBC_3 and chol = chol_1 and glucose = gluc_1 | Normal     | 5.79        | 100.00         |
| 92   | WBC = WBC_3 and glucose = gluc_1 and HDL = HDL_2   | Normal     | 9.47        | 100.00         |
| 93   | WBC = WBC_3 and glucose = gluc_1 and TG = TG_1     | Normal     | 11.05       | 100.00         |
| 94   | Hb = Hb_2 and WBC = WBC_1 and glucose = gluc_1     | Normal     | 6.32        | 100.00         |
| 95   | Hb = Hb_2 and LDL = LDL_1 and glucose = gluc_1     | Normal     | 6.32        | 100.00         |
| 96   | Hb = Hb_2 and LDL = LDL_1 and TG = TG_1            | Normal     | 5.79        | 100.00         |
| 97   | Hb = Hb_2 and RBC = RBC_2 and glucose = gluc_1     | Normal     | 8.95        | 100.00         |
| 98   | Hb = Hb_2 and sex = M and glucose = gluc_1         | Normal     | 6.84        | 100.00         |
| 99   | Hb = Hb_2 and chol = chol_1 and glucose = gluc_1   | Normal     | 9.47        | 100.00         |
| 100  | Hb = Hb_2 and glucose = gluc_1 and HDL = HDL_2     | Normal     | 14.74       | 100.00         |
| 101  | Hb = Hb_2 and glucose = gluc_1 and TG = TG_1       | Normal     | 14.21       | 100.00         |
| 102  | WBC = WBC_1 and chol = chol_2 and glucose = gluc_1 | Normal     | 6.84        | 100.00         |
| 103  | WBC = WBC_1 and RBC = RBC_2 and glucose = gluc_1   | Normal     | 5.79        | 100.00         |
| 104  | WBC = WBC_1 and LDL = LDL_2 and glucose = gluc_1   | Normal     | 7.37        | 100.00         |
| 105  | chol = chol_2 and glucose = gluc_1 and HDL = HDL_2 | Normal     | 12.63       | 100.00         |
| 106  | chol = chol_2 and glucose = gluc_1 and TG = TG_1   | Normal     | 15.26       | 100.00         |
| 107  | LDL = LDL_1 and RBC = RBC_2 and glucose = gluc_1   | Normal     | 6.32        | 100.00         |
| 108  | RBC = RBC_2 and LDL = LDL_2 and glucose = gluc_1   | Normal     | 7.89        | 100.00         |
| 109  | RBC = RBC_2 and sex = M and glucose = gluc_1       | Normal     | 5.79        | 100.00         |
| 110  | RBC = RBC_2 and chol = chol_1 and glucose = gluc_1 | Normal     | 12.63       | 100.00         |

| Rule | Antecedent                                                         | Consequent | Support (%) | Confidence (%) |
|------|--------------------------------------------------------------------|------------|-------------|----------------|
| 111  | RBC = RBC_2 and glucose = gluc_1 and HDL = HDL_2                   | Normal     | 13.68       | 100.00         |
| 112  | RBC = RBC_2 and glucose = gluc_1 and TG = TG_1                     | Normal     | 16.32       | 100.00         |
| 113  | LDL = LDL_2 and chol = chol_1 and glucose = gluc_1                 | Normal     | 13.16       | 100.00         |
| 114  | LDL = LDL_2 and glucose = gluc_1 and HDL = HDL_2                   | Normal     | 12.63       | 100.00         |
| 115  | LDL = LDL_2 and glucose = gluc_1 and TG = TG_1                     | Normal     | 14.21       | 100.00         |
| 116  | LDL = LDL_4 and chol = chol_3 and glucose = gluc_1 and HDL = HDL_2 | Normal     | 7.37        | 100.00         |
| 117  | chol = chol_3 and Hct = Hct_4 and Hb = Hb_4 and glucose = gluc_1   | Normal     | 5.26        | 100.00         |
| 118  | chol = chol_3 and glucose = gluc_1 and HDL = HDL_2 and TG = TG_1   | Normal     | 5.26        | 100.00         |
| 119  | RBC = RBC_4 and Hct = Hct_4 and glucose = gluc_1 and TG = TG_1     | Normal     | 5.26        | 100.00         |
| 120  | RBC = RBC_3 and chol = chol_2 and glucose = gluc_1 and TG = TG_1   | Normal     | 5.26        | 100.00         |
| 121  | RBC = RBC_3 and glucose = gluc_1 and HDL = HDL_2 and TG = TG_1     | Normal     | 6.32        | 100.00         |
| 122  | LDL = LDL_3 and WBC = WBC_1 and glucose = gluc_1 and TG = TG_1     | Normal     | 5.79        | 100.00         |
| 123  | LDL = LDL_3 and chol = chol_2 and glucose = gluc_1 and HDL = HDL_2 | Normal     | 7.37        | 100.00         |
| 124  | LDL = LDL_3 and chol = chol_2 and glucose = gluc_1 and TG = TG_1   | Normal     | 9.47        | 100.00         |
| 125  | LDL = LDL_3 and glucose = gluc_1 and HDL = HDL_2 and TG = TG_1     | Normal     | 8.42        | 100.00         |
| 126  | Hb = Hb_3 and Hct = Hct_3 and LDL = LDL_2 and glucose = gluc_1     | Normal     | 5.26        | 100.00         |
| 127  | Hb = Hb_3 and Hct = Hct_3 and chol = chol_1 and glucose = gluc_1   | Normal     | 6.32        | 100.00         |
| 128  | Hb = Hb_3 and Hct = Hct_3 and glucose = gluc_1 and HDL = HDL_2     | Normal     | 6.32        | 100.00         |
| 129  | Hb = Hb_3 and Hct = Hct_3 and glucose = gluc_1 and TG = TG_1       | Normal     | 8.42        | 100.00         |
| 130  | Hb = Hb_3 and RBC = RBC_2 and glucose = gluc_1 and TG = TG_1       | Normal     | 5.26        | 100.00         |
| 131  | Hb = Hb_3 and chol = chol_1 and glucose = gluc_1 and TG = TG_1     | Normal     | 5.26        | 100.00         |
| 132  | Hb = Hb_3 and glucose = gluc_1 and HDL = HDL_2 and TG = TG_1       | Normal     | 7.37        | 100.00         |
| 133  | Hct = Hct_4 and Hb = Hb_4 and glucose = gluc_1 and HDL = HDL_2     | Normal     | 7.89        | 100.00         |
| 134  | Hct = Hct_4 and Hb = Hb_4 and glucose = gluc_1 and TG = TG_1       | Normal     | 7.89        | 100.00         |
| 135  | Hct = Hct_4 and glucose = gluc_1 and HDL = HDL_2 and TG = TG_1     | Normal     | 6.84        | 100.00         |
| 136  | Hb = Hb_4 and glucose = gluc_1 and HDL = HDL_2 and TG = TG_1       | Normal     | 7.37        | 100.00         |
| 137  | WBC = WBC_2 and sex = M and glucose = gluc_1 and HDL = HDL_2       | Normal     | 5.79        | 100.00         |
| 138  | WBC = WBC_2 and glucose = gluc_1 and HDL = HDL_2 and TG = TG_1     | Normal     | 8.42        | 100.00         |
| 139  | Hct = Hct_3 and chol = chol_2 and glucose = gluc_1 and TG = TG_1   | Normal     | 5.26        | 100.00         |
| 140  | Hct = Hct_3 and chol = chol_1 and glucose = gluc_1 and TG = TG_1   | Normal     | 5.79        | 100.00         |
| 141  | Hct = Hct_3 and glucose = gluc_1 and HDL = HDL_2 and TG = TG_1     | Normal     | 8.95        | 100.00         |
| 142  | Hct = Hct_1 and Hb = Hb_1 and RBC = RBC_1 and glucose = gluc_1     | Normal     | 6.84        | 100.00         |
| 143  | Hct = Hct_1 and RBC = RBC_1 and chol = chol_1 and glucose = gluc_1 | Normal     | 5.26        | 100.00         |
| 144  | Hct = Hct_1 and RBC = RBC_1 and glucose = gluc_1 and HDL = HDL_2   | Normal     | 7.37        | 100.00         |
| 145  | Hct = Hct_1 and RBC = RBC_1 and glucose = gluc_1 and TG = TG_1     | Normal     | 7.37        | 100.00         |
| 146  | Hct = Hct_2 and Hb = Hb_2 and WBC = WBC_1 and glucose = gluc_1     | Normal     | 5.79        | 100.00         |
| 147  | Hct = Hct_2 and Hb = Hb_2 and RBC = RBC_2 and glucose = gluc_1     | Normal     | 6.84        | 100.00         |
| 148  | Hct = Hct_2 and Hb = Hb_2 and chol = chol_1 and glucose = gluc_1   | Normal     | 6.84        | 100.00         |
| 149  | Hct = Hct_2 and Hb = Hb_2 and glucose = gluc_1 and HDL = HDL_2     | Normal     | 10.00       | 100.00         |
| 150  | Hct = Hct_2 and Hb = Hb_2 and glucose = gluc_1 and TG = TG_1       | Normal     | 10.53       | 100.00         |
| 151  | Hct = Hct_2 and WBC = WBC_1 and glucose = gluc_1 and HDL = HDL_2   | Normal     | 5.79        | 100.00         |
| 152  | Hct = Hct_2 and WBC = WBC_1 and glucose = gluc_1 and TG = TG_1     | Normal     | 6.32        | 100.00         |
| 153  | Hct = Hct_2 and LDL = LDL_1 and chol = chol_1 and glucose = gluc_1 | Normal     | 6.84        | 100.00         |
| 154  | Hct = Hct_2 and LDL = LDL_1 and glucose = gluc_1 and HDL = HDL_2   | Normal     | 6.32        | 100.00         |

| Rule | Antecedent                                                         | Consequent | Support (%) | Confidence (%) |
|------|--------------------------------------------------------------------|------------|-------------|----------------|
| 155  | Hct = Hct_2 and LDL = LDL_1 and glucose = gluc_1 and TG = TG_1     | Normal     | 6.32        | 100.00         |
| 156  | Hct = Hct_2 and RBC = RBC_2 and chol = chol_1 and glucose = gluc_1 | Normal     | 5.79        | 100.00         |
| 157  | Hct = Hct_2 and RBC = RBC_2 and glucose = gluc_1 and HDL = HDL_2   | Normal     | 6.32        | 100.00         |
| 158  | Hct = Hct_2 and RBC = RBC_2 and glucose = gluc_1 and TG = TG_1     | Normal     | 8.42        | 100.00         |
| 159  | Hct = Hct_2 and sex = M and glucose = gluc_1 and HDL = HDL_2       | Normal     | 5.79        | 100.00         |
| 160  | Hct = Hct_2 and chol = chol_1 and glucose = gluc_1 and HDL = HDL_2 | Normal     | 7.89        | 100.00         |
| 161  | Hct = Hct_2 and chol = chol_1 and glucose = gluc_1 and TG = TG_1   | Normal     | 8.42        | 100.00         |
| 162  | Hct = Hct_2 and glucose = gluc_1 and HDL = HDL_2 and TG = TG_1     | Normal     | 10.53       | 100.00         |
| 163  | Hb = Hb_1 and RBC = RBC_1 and glucose = gluc_1 and HDL = HDL_2     | Normal     | 5.79        | 100.00         |
| 164  | Hb = Hb_1 and RBC = RBC_1 and glucose = gluc_1 and TG = TG_1       | Normal     | 5.79        | 100.00         |
| 165  | RBC = RBC_1 and Hb = Hb_2 and glucose = gluc_1 and HDL = HDL_2     | Normal     | 5.79        | 100.00         |
| 166  | RBC = RBC_1 and WBC = WBC_1 and glucose = gluc_1 and HDL = HDL_2   | Normal     | 5.79        | 100.00         |
| 167  | RBC = RBC_1 and WBC = WBC_1 and glucose = gluc_1 and TG = TG_1     | Normal     | 5.79        | 100.00         |
| 168  | RBC = RBC_1 and LDL = LDL_1 and chol = chol_1 and glucose = gluc_1 | Normal     | 6.84        | 100.00         |
| 169  | RBC = RBC_1 and LDL = LDL_1 and glucose = gluc_1 and HDL = HDL_2   | Normal     | 6.32        | 100.00         |
| 170  | RBC = RBC_1 and LDL = LDL_1 and glucose = gluc_1 and TG = TG_1     | Normal     | 6.32        | 100.00         |
| 171  | RBC = RBC_1 and chol = chol_1 and glucose = gluc_1 and HDL = HDL_2 | Normal     | 8.42        | 100.00         |
| 172  | RBC = RBC_1 and chol = chol_1 and glucose = gluc_1 and TG = TG_1   | Normal     | 8.95        | 100.00         |
| 173  | RBC = RBC_1 and glucose = gluc_1 and HDL = HDL_2 and TG = TG_1     | Normal     | 10.53       | 100.00         |
| 174  | WBC = WBC_3 and glucose = gluc_1 and HDL = HDL_2 and TG = TG_1     | Normal     | 8.42        | 100.00         |
| 175  | Hb = Hb_2 and WBC = WBC_1 and glucose = gluc_1 and HDL = HDL_2     | Normal     | 5.26        | 100.00         |
| 176  | Hb = Hb_2 and WBC = WBC_1 and glucose = gluc_1 and TG = TG_1       | Normal     | 6.32        | 100.00         |
| 177  | Hb = Hb_2 and LDL = LDL_1 and chol = chol_1 and glucose = gluc_1   | Normal     | 6.32        | 100.00         |
| 178  | Hb = Hb_2 and LDL = LDL_1 and chol = chol_1 and TG = TG_1          | Normal     | 5.79        | 100.00         |
| 179  | Hb = Hb_2 and LDL = LDL_1 and glucose = gluc_1 and HDL = HDL_2     | Normal     | 5.79        | 100.00         |
| 180  | Hb = Hb_2 and LDL = LDL_1 and glucose = gluc_1 and TG = TG_1       | Normal     | 5.79        | 100.00         |
| 181  | Hb = Hb_2 and LDL = LDL_1 and HDL = HDL_2 and TG = TG_1            | Normal     | 5.26        | 100.00         |
| 182  | Hb = Hb_2 and RBC = RBC_2 and glucose = gluc_1 and HDL = HDL_2     | Normal     | 6.32        | 100.00         |
| 183  | Hb = Hb_2 and RBC = RBC_2 and glucose = gluc_1 and TG = TG_1       | Normal     | 7.37        | 100.00         |
| 184  | Hb = Hb_2 and sex = M and glucose = gluc_1 and HDL = HDL_2         | Normal     | 6.84        | 100.00         |
| 185  | Hb = Hb_2 and chol = chol_1 and glucose = gluc_1 and HDL = HDL_2   | Normal     | 7.89        | 100.00         |
| 186  | Hb = Hb_2 and chol = chol_1 and glucose = gluc_1 and TG = TG_1     | Normal     | 8.42        | 100.00         |
| 187  | Hb = Hb_2 and glucose = gluc_1 and HDL = HDL_2 and TG = TG_1       | Normal     | 11.58       | 100.00         |
| 188  | WBC = WBC_1 and chol = chol_2 and glucose = gluc_1 and HDL = HDL_2 | Normal     | 5.26        | 100.00         |
| 189  | WBC = WBC_1 and chol = chol_2 and glucose = gluc_1 and TG = TG_1   | Normal     | 6.84        | 100.00         |
| 190  | WBC = WBC_1 and RBC = RBC_2 and glucose = gluc_1 and TG = TG_1     | Normal     | 5.79        | 100.00         |
| 191  | WBC = WBC_1 and LDL = LDL_2 and chol = chol_1 and glucose = gluc_1 | Normal     | 5.26        | 100.00         |
| 192  | WBC = WBC_1 and LDL = LDL_2 and glucose = gluc_1 and HDL = HDL_2   | Normal     | 5.79        | 100.00         |
| 193  | WBC = WBC_1 and LDL = LDL_2 and glucose = gluc_1 and TG = TG_1     | Normal     | 5.79        | 100.00         |
| 194  | chol = chol_2 and glucose = gluc_1 and HDL = HDL_2 and TG = TG_1   | Normal     | 11.58       | 100.00         |
| 195  | LDL = LDL_1 and RBC = RBC_2 and chol = chol_1 and glucose = gluc_1 | Normal     | 6.32        | 100.00         |
| 196  | LDL = LDL_1 and RBC = RBC_2 and glucose = gluc_1 and HDL = HDL_2   | Normal     | 5.26        | 100.00         |
| 197  | LDL = LDL_1 and RBC = RBC_2 and glucose = gluc_1 and TG = TG_1     | Normal     | 6.32        | 100.00         |
| 198  | RBC = RBC_2 and LDL = LDL_2 and chol = chol_1 and glucose = gluc_1 | Normal     | 6.32        | 100.00         |

| Rule | Antecedent                                                                         | Consequent | Support (%) | Confidence (%) |
|------|------------------------------------------------------------------------------------|------------|-------------|----------------|
| 199  | RBC = RBC_2 and LDL = LDL_2 and glucose = gluc_1 and TG = TG_1                     | Normal     | 6.32        | 100.00         |
| 200  | RBC = RBC_2 and chol = chol_1 and glucose = gluc_1 and HDL = HDL_2                 | Normal     | 8.42        | 100.00         |
| 201  | RBC = RBC_2 and chol = chol_1 and glucose = gluc_1 and TG = TG_1                   | Normal     | 11.05       | 100.00         |
| 202  | RBC = RBC_2 and glucose = gluc_1 and HDL = HDL_2 and TG = TG_1                     | Normal     | 12.11       | 100.00         |
| 203  | LDL = LDL_2 and chol = chol_1 and glucose = gluc_1 and HDL = HDL_2                 | Normal     | 7.89        | 100.00         |
| 204  | LDL = LDL_2 and chol = chol_1 and glucose = gluc_1 and TG = TG_1                   | Normal     | 10.00       | 100.00         |
| 205  | LDL = LDL_2 and glucose = gluc_1 and HDL = HDL_2 and TG = TG_1                     | Normal     | 11.05       | 100.00         |
| 206  | LDL = LDL_3 and chol = chol_2 and glucose = gluc_1 and HDL = HDL_2 and TG = TG_1   | Normal     | 6.32        | 100.00         |
| 207  | Hb = Hb_3 and Hct = Hct_3 and glucose = gluc_1 and HDL = HDL_2 and TG = TG_1       | Normal     | 5.79        | 100.00         |
| 208  | Hct = Hct_4 and Hb = Hb_4 and glucose = gluc_1 and HDL = HDL_2 and TG = TG_1       | Normal     | 5.79        | 100.00         |
| 209  | Hct = Hct_1 and Hb = Hb_1 and RBC = RBC_1 and glucose = gluc_1 and HDL = HDL_2     | Normal     | 5.79        | 100.00         |
| 210  | Hct = Hct_1 and Hb = Hb_1 and RBC = RBC_1 and glucose = gluc_1 and TG = TG_1       | Normal     | 5.79        | 100.00         |
| 211  | Hct = Hct_1 and RBC = RBC_1 and chol = chol_1 and glucose = gluc_1 and TG = TG_1   | Normal     | 5.26        | 100.00         |
| 212  | Hct = Hct_1 and RBC = RBC_1 and glucose = gluc_1 and HDL = HDL_2 and TG = TG_1     | Normal     | 6.84        | 100.00         |
| 213  | Hct = Hct_2 and Hb = Hb_2 and WBC = WBC_1 and glucose = gluc_1 and TG = TG_1       | Normal     | 5.79        | 100.00         |
| 214  | Hct = Hct_2 and Hb = Hb_2 and RBC = RBC_2 and glucose = gluc_1 and TG = TG_1       | Normal     | 6.32        | 100.00         |
| 215  | Hct = Hct_2 and Hb = Hb_2 and chol = chol_1 and glucose = gluc_1 and HDL = HDL_2   | Normal     | 5.79        | 100.00         |
| 216  | Hct = Hct_2 and Hb = Hb_2 and chol = chol_1 and glucose = gluc_1 and TG = TG_1     | Normal     | 6.32        | 100.00         |
| 217  | Hct = Hct_2 and Hb = Hb_2 and glucose = gluc_1 and HDL = HDL_2 and TG = TG_1       | Normal     | 8.42        | 100.00         |
| 218  | Hct = Hct_2 and WBC = WBC_1 and glucose = gluc_1 and HDL = HDL_2 and TG = TG_1     | Normal     | 5.26        | 100.00         |
| 219  | Hct = Hct_2 and LDL = LDL_1 and chol = chol_1 and glucose = gluc_1 and HDL = HDL_2 | Normal     | 6.32        | 100.00         |
| 220  | Hct = Hct_2 and LDL = LDL_1 and chol = chol_1 and glucose = gluc_1 and TG = TG_1   | Normal     | 6.32        | 100.00         |
| 221  | Hct = Hct_2 and LDL = LDL_1 and glucose = gluc_1 and HDL = HDL_2 and TG = TG_1     | Normal     | 5.79        | 100.00         |
| 222  | Hct = Hct_2 and RBC = RBC_2 and chol = chol_1 and glucose = gluc_1 and TG = TG_1   | Normal     | 5.79        | 100.00         |
| 223  | Hct = Hct_2 and RBC = RBC_2 and glucose = gluc_1 and HDL = HDL_2 and TG = TG_1     | Normal     | 5.79        | 100.00         |
| 224  | Hct = Hct_2 and chol = chol_1 and glucose = gluc_1 and HDL = HDL_2 and TG = TG_1   | Normal     | 6.84        | 100.00         |
| 225  | Hb = Hb_1 and RBC = RBC_1 and glucose = gluc_1 and HDL = HDL_2 and TG = TG_1       | Normal     | 5.26        | 100.00         |
| 226  | RBC = RBC_1 and WBC = WBC_1 and glucose = gluc_1 and HDL = HDL_2 and TG = TG_1     | Normal     | 5.79        | 100.00         |
| 227  | RBC = RBC_1 and LDL = LDL_1 and chol = chol_1 and glucose = gluc_1 and HDL = HDL_2 | Normal     | 6.32        | 100.00         |
| 228  | RBC = RBC_1 and LDL = LDL_1 and chol = chol_1 and glucose = gluc_1 and TG = TG_1   | Normal     | 6.32        | 100.00         |
| 229  | RBC = RBC_1 and LDL = LDL_1 and glucose = gluc_1 and HDL = HDL_2 and TG = TG_1     | Normal     | 5.79        | 100.00         |
| 230  | RBC = RBC_1 and chol = chol_1 and glucose = gluc_1 and HDL = HDL_2 and TG = TG_1   | Normal     | 7.89        | 100.00         |
| 231  | Hb = Hb_2 and WBC = WBC_1 and glucose = gluc_1 and HDL = HDL_2 and TG = TG_1       | Normal     | 5.26        | 100.00         |
| 232  | Hb = Hb_2 and LDL = LDL_1 and chol = chol_1 and glucose = gluc_1 and HDL = HDL_2   | Normal     | 5.79        | 100.00         |
| 233  | Hb = Hb_2 and LDL = LDL_1 and chol = chol_1 and glucose = gluc_1 and TG = TG_1     | Normal     | 5.79        | 100.00         |
| 234  | Hb = Hb_2 and LDL = LDL_1 and chol = chol_1 and HDL = HDL_2 and TG = TG_1          | Normal     | 5.26        | 100.00         |
| 235  | Hb = Hb_2 and LDL = LDL_1 and glucose = gluc_1 and HDL = HDL_2 and TG = TG_1       | Normal     | 5.26        | 100.00         |

| Rule | Antecedent                                                                         | Consequent | Support (%) | Confidence (%) |
|------|------------------------------------------------------------------------------------|------------|-------------|----------------|
| 236  | Hb = Hb_2 and chol = chol_1 and glucose = gluc_1 and HDL = HDL_2 and TG = TG_1     | Normal     | 6.84        | 100.00         |
| 237  | WBC = WBC_1 and chol = chol_2 and glucose = gluc_1 and HDL = HDL_2 and TG = TG_1   | Normal     | 5.26        | 100.00         |
| 238  | LDL = LDL_1 and RBC = RBC_2 and chol = chol_1 and glucose = gluc_1 and HDL = HDL_2 | Normal     | 5.26        | 100.00         |
| 239  | LDL = LDL_1 and RBC = RBC_2 and chol = chol_1 and glucose = gluc_1 and TG = TG_1   | Normal     | 6.32        | 100.00         |
| 240  | LDL = LDL_1 and RBC = RBC_2 and glucose = gluc_1 and HDL = HDL_2 and TG = TG_1     | Normal     | 5.26        | 100.00         |
| 241  | RBC = RBC_2 and chol = chol_1 and glucose = gluc_1 and HDL = HDL_2 and TG = TG_1   | Normal     | 7.89        | 100.00         |
| 242  | LDL = LDL_2 and chol = chol_1 and glucose = gluc_1 and HDL = HDL_2 and TG = TG_1   | Normal     | 6.84        | 100.00         |
| 243  | glucose = gluc_1                                                                   | Normal     | 56.32       | 99.07          |
| 244  | glucose = gluc_1 and TG = TG_1                                                     | Normal     | 44.21       | 98.81          |
| 245  | glucose = gluc_1 and HDL = HDL_2                                                   | Normal     | 43.68       | 98.80          |
| 246  | glucose = gluc_1 and HDL = HDL_2 and TG = TG_1                                     | Normal     | 35.26       | 98.51          |
| 247  | chol = chol_1 and glucose = gluc_1                                                 | Normal     | 27.89       | 98.11          |
| 248  | chol = chol_1 and glucose = gluc_1 and TG = TG_1                                   | Normal     | 23.16       | 97.73          |
| 249  | chol = chol_1 and glucose = gluc_1 and HDL = HDL_2                                 | Normal     | 21.05       | 97.50          |
| 250  | WBC = WBC_1 and glucose = gluc_1                                                   | Normal     | 18.95       | 97.22          |
| 251  | chol = chol_1 and glucose = gluc_1 and HDL = HDL_2 and TG = TG_1                   | Normal     | 18.42       | 97.14          |
| 252  | sex = M and glucose = gluc_1                                                       | Normal     | 17.37       | 96.97          |
| 253  | WBC = WBC_1 and glucose = gluc_1 and TG = TG_1                                     | Normal     | 17.37       | 96.97          |
| 254  | WBC = WBC_1 and glucose = gluc_1 and HDL = HDL_2                                   | Normal     | 15.79       | 96.67          |
| 255  | sex = M and glucose = gluc_1 and HDL = HDL_2                                       | Normal     | 15.26       | 96.55          |
| 256  | WBC = WBC_1 and glucose = gluc_1 and HDL = HDL_2 and TG = TG_1                     | Normal     | 14.74       | 96.43          |
| 257  | LDL = LDL_1 and glucose = gluc_1                                                   | Normal     | 14.21       | 96.30          |
| 258  | LDL = LDL_1 and chol = chol_1 and glucose = gluc_1                                 | Normal     | 14.21       | 96.30          |
| 259  | RBC = RBC_4 and glucose = gluc_1                                                   | Normal     | 13.16       | 96.00          |
| 260  | Hct = Hct_1 and glucose = gluc_1                                                   | Normal     | 13.16       | 96.00          |
| 261  | LDL = LDL_1 and glucose = gluc_1 and TG = TG_1                                     | Normal     | 13.16       | 96.00          |
| 262  | LDL = LDL_1 and chol = chol_1 and glucose = gluc_1 and TG = TG_1                   | Normal     | 13.16       | 96.00          |
| 263  | Hb = Hb_1 and glucose = gluc_1                                                     | Normal     | 12.63       | 95.83          |
| 264  | LDL = LDL_1 and glucose = gluc_1 and HDL = HDL_2                                   | Normal     | 12.63       | 95.83          |
| 265  | sex = M and glucose = gluc_1 and TG = TG_1                                         | Normal     | 12.63       | 95.83          |
| 266  | LDL = LDL_1 and chol = chol_1 and glucose = gluc_1 and HDL = HDL_2                 | Normal     | 12.63       | 95.83          |
| 267  | LDL = LDL_1 and glucose = gluc_1 and HDL = HDL_2 and TG = TG_1                     | Normal     | 11.58       | 95.45          |
| 268  | LDL = LDL_1 and chol = chol_1 and glucose = gluc_1 and HDL = HDL_2 and TG = TG_1   | Normal     | 11.58       | 95.45          |
| 269  | sex = M and glucose = gluc_1 and HDL = HDL_2 and TG = TG_1                         | Normal     | 11.05       | 95.24          |
| 270  | Hct = Hct_1 and glucose = gluc_1 and HDL = HDL_2                                   | Normal     | 10.53       | 95.00          |
| 271  | Hct = Hct_1 and glucose = gluc_1 and TG = TG_1                                     | Normal     | 10.53       | 95.00          |
| 272  | Hb = Hb_1 and glucose = gluc_1 and HDL = HDL_2                                     | Normal     | 10.53       | 95.00          |
| 273  | Hct = Hct_1 and Hb = Hb_1 and glucose = gluc_1                                     | Normal     | 10.00       | 94.74          |
| 274  | Hb = Hb_1 and glucose = gluc_1 and TG = TG_1                                       | Normal     | 10.00       | 94.74          |
| 275  | WBC = WBC_1 and chol = chol_1 and glucose = gluc_1                                 | Normal     | 10.00       | 94.74          |
| 276  | sex = M and chol = chol_1 and glucose = gluc_1                                     | Normal     | 10.00       | 94.74          |
| 277  | RBC = RBC_4 and glucose = gluc_1 and HDL = HDL_2                                   | Normal     | 8.95        | 94.12          |

| Rule | Antecedent                                                                       | Consequent | Support (%) | Confidence (%) |
|------|----------------------------------------------------------------------------------|------------|-------------|----------------|
| 278  | RBC = RBC_4 and glucose = gluc_1 and TG = TG_1                                   | Normal     | 8.95        | 94.12          |
| 279  | Hct = Hct_1 and chol = chol_1 and glucose = gluc_1                               | Normal     | 8.95        | 94.12          |
| 280  | Hb = Hb_1 and chol = chol_1 and glucose = gluc_1                                 | Normal     | 8.95        | 94.12          |
| 281  | Hct = Hct_1 and glucose = gluc_1 and HDL = HDL_2 and TG = TG_1                   | Normal     | 8.95        | 94.12          |
| 282  | Hb = Hb_1 and glucose = gluc_1 and HDL = HDL_2 and TG = TG_1                     | Normal     | 8.95        | 94.12          |
| 283  | WBC = WBC_1 and chol = chol_1 and glucose = gluc_1 and TG = TG_1                 | Normal     | 8.95        | 94.12          |
| 284  | WBC = WBC_1 and chol = chol_1 and glucose = gluc_1 and HDL = HDL_2               | Normal     | 8.42        | 93.75          |
| 285  | sex = M and chol = chol_1 and glucose = gluc_1 and HDL = HDL_2                   | Normal     | 8.42        | 93.75          |
| 286  | sex = M and chol = chol_1 and glucose = gluc_1 and TG = TG_1                     | Normal     | 8.42        | 93.75          |
| 287  | Hct = Hct_1 and Hb = Hb_1 and glucose = gluc_1 and HDL = HDL_2                   | Normal     | 7.89        | 93.33          |
| 288  | Hct = Hct_1 and Hb = Hb_1 and glucose = gluc_1 and TG = TG_1                     | Normal     | 7.89        | 93.33          |
| 289  | WBC = WBC_1 and chol = chol_1 and glucose = gluc_1 and HDL = HDL_2 and TG = TG_1 | Normal     | 7.89        | 93.33          |
| 290  | Hct = Hct_1 and chol = chol_1 and glucose = gluc_1 and TG = TG_1                 | Normal     | 7.37        | 92.86          |
| 291  | Hb = Hb_1 and chol = chol_1 and glucose = gluc_1 and HDL = HDL_2                 | Normal     | 7.37        | 92.86          |
| 292  | Hb = Hb_1 and chol = chol_1 and glucose = gluc_1 and TG = TG_1                   | Normal     | 7.37        | 92.86          |
| 293  | sex = M and chol = chol_1 and glucose = gluc_1 and HDL = HDL_2 and TG = TG_1     | Normal     | 7.37        | 92.86          |
| 294  | Hct = Hct_1 and Hb = Hb_1 and chol = chol_1 and glucose = gluc_1                 | Normal     | 6.84        | 92.31          |
| 295  | Hct = Hct_1 and chol = chol_1 and glucose = gluc_1 and HDL = HDL_2               | Normal     | 6.84        | 92.31          |
| 296  | Hct = Hct_1 and Hb = Hb_1 and glucose = gluc_1 and HDL = HDL_2 and TG = TG_1     | Normal     | 6.84        | 92.31          |
| 297  | Hb = Hb_2 and LDL = LDL_1 and HDL = HDL_2                                        | Normal     | 6.32        | 91.67          |
| 298  | RBC = RBC_4 and glucose = gluc_1 and HDL = HDL_2 and TG = TG_1                   | Normal     | 6.32        | 91.67          |
| 299  | Hb = Hb_2 and LDL = LDL_1 and chol = chol_1 and HDL = HDL_2                      | Normal     | 6.32        | 91.67          |
| 300  | Hb = Hb_1 and chol = chol_1 and glucose = gluc_1 and HDL = HDL_2 and TG = TG_1   | Normal     | 6.32        | 91.67          |
| 301  | Hct = Hct_1 and Hb = Hb_1 and chol = chol_1 and glucose = gluc_1 and TG = TG_1   | Normal     | 5.79        | 90.91          |
| 302  | Hct = Hct_1 and chol = chol_1 and glucose = gluc_1 and HDL = HDL_2 and TG = TG_1 | Normal     | 5.79        | 90.91          |
| 303  | RBC = RBC_4 and WBC = WBC_1 and glucose = gluc_1                                 | Normal     | 5.26        | 90.00          |
| 304  | Hct = Hct_1 and WBC = WBC_1 and glucose = gluc_1                                 | Normal     | 5.26        | 90.00          |
| 305  | Hb = Hb_1 and WBC = WBC_1 and glucose = gluc_1                                   | Normal     | 5.26        | 90.00          |
| 306  | WBC = WBC_1 and sex = M and glucose = gluc_1                                     | Normal     | 5.26        | 90.00          |
| 307  | LDL = LDL_1 and sex = M and glucose = gluc_1                                     | Normal     | 5.26        | 90.00          |
| 308  | Hct = Hct_1 and WBC = WBC_1 and glucose = gluc_1 and TG = TG_1                   | Normal     | 5.26        | 90.00          |
| 309  | Hct = Hct_2 and Hb = Hb_2 and LDL = LDL_1 and HDL = HDL_2                        | Normal     | 5.26        | 90.00          |
| 310  | WBC = WBC_1 and sex = M and glucose = gluc_1 and HDL = HDL_2                     | Normal     | 5.26        | 90.00          |
| 311  | LDL = LDL_1 and sex = M and chol = chol_1 and glucose = gluc_1                   | Normal     | 5.26        | 90.00          |
| 312  | LDL = LDL_1 and sex = M and glucose = gluc_1 and HDL = HDL_2                     | Normal     | 5.26        | 90.00          |
| 313  | LDL = LDL_1 and sex = M and glucose = gluc_1 and TG = TG_1                       | Normal     | 5.26        | 90.00          |
| 314  | Hct = Hct_1 and Hb = Hb_1 and chol = chol_1 and glucose = gluc_1 and HDL = HDL_2 | Normal     | 5.26        | 90.00          |
| 315  | Hct = Hct_2 and Hb = Hb_2 and LDL = LDL_1 and chol = chol_1 and HDL = HDL_2      | Normal     | 5.26        | 90.00          |
| 316  | LDL = LDL_1 and sex = M and chol = chol_1 and glucose = gluc_1 and HDL = HDL_2   | Normal     | 5.26        | 90.00          |
| 317  | LDL = LDL_1 and sex = M and chol = chol_1 and glucose = gluc_1 and TG = TG_1     | Normal     | 5.26        | 90.00          |
| 318  | LDL = LDL_1 and sex = M and glucose = gluc_1 and HDL = HDL_2 and TG = TG_1       | Normal     | 5.26        | 90.00          |
| 319  | WBC = WBC_1 and chol = chol_2                                                    | Normal     | 7.89        | 86.67          |



| Rule | Antecedent                                                                  | Consequent | Support (%) | Confidence (%) |
|------|-----------------------------------------------------------------------------|------------|-------------|----------------|
| 320  | WBC = WBC_1 and chol = chol_2 and TG = TG_1                                 | Normal     | 7.89        | 86.67          |
| 321  | LDL = LDL_4 and Hct = Hct_4                                                 | Normal     | 6.32        | 83.33          |
| 322  | Hb = Hb_2 and WBC = WBC_1 and HDL = HDL_2                                   | Normal     | 6.32        | 83.33          |
| 323  | WBC = WBC_1 and chol = chol_2 and HDL = HDL_2                               | Normal     | 6.32        | 83.33          |
| 324  | Hb = Hb_2 and WBC = WBC_1 and HDL = HDL_2 and TG = TG_1                     | Normal     | 6.32        | 83.33          |
| 325  | WBC = WBC_1 and chol = chol_2 and HDL = HDL_2 and TG = TG_1                 | Normal     | 6.32        | 83.33          |
| 326  | chol = chol_3 and WBC = WBC_2                                               | Normal     | 5.79        | 81.82          |
| 327  | LDL = LDL_4 and Hct = Hct_4 and Hb = Hb_4                                   | Normal     | 5.79        | 81.82          |
| 328  | chol = chol_3 and WBC = WBC_2 and HDL = HDL_2                               | Normal     | 5.79        | 81.82          |
| 329  | LDL = LDL_3 and Hct = Hct_3 and chol = chol_2                               | Normal     | 5.79        | 81.82          |
| 330  | Hct = Hct_2 and Hb = Hb_2 and WBC = WBC_1 and HDL = HDL_2                   | Normal     | 5.79        | 81.82          |
| 331  | Hct = Hct_2 and Hb = Hb_2 and WBC = WBC_1 and HDL = HDL_2 and TG = TG_1     | Normal     | 5.79        | 81.82          |
| 332  | LDL = LDL_4 and WBC = WBC_2                                                 | Normal     | 5.26        | 80.00          |
| 333  | LDL = LDL_3 and Hb = Hb_3                                                   | Normal     | 5.26        | 80.00          |
| 334  | Hb = Hb_2 and WBC = WBC_1                                                   | Normal     | 7.89        | 80.00          |
| 335  | Hb = Hb_2 and LDL = LDL_1                                                   | Normal     | 7.89        | 80.00          |
| 336  | LDL = LDL_4 and chol = chol_3 and Hct = Hct_4                               | Normal     | 5.26        | 80.00          |
| 337  | RBC = RBC_3 and LDL = LDL_3 and TG = TG_1                                   | Normal     | 5.26        | 80.00          |
| 338  | Hct = Hct_2 and LDL = LDL_1 and TG = TG_1                                   | Normal     | 7.89        | 80.00          |
| 339  | WBC = WBC_3 and chol = chol_2 and TG = TG_1                                 | Normal     | 5.26        | 80.00          |
| 340  | Hb = Hb_2 and WBC = WBC_1 and TG = TG_1                                     | Normal     | 7.89        | 80.00          |
| 341  | Hb = Hb_2 and LDL = LDL_1 and chol = chol_1                                 | Normal     | 7.89        | 80.00          |
| 342  | Hct = Hct_2 and LDL = LDL_1 and RBC = RBC_2 and TG = TG_1                   | Normal     | 5.26        | 80.00          |
| 343  | Hct = Hct_2 and LDL = LDL_1 and chol = chol_1 and TG = TG_1                 | Normal     | 7.89        | 80.00          |
| 344  | RBC = RBC_1 and Hb = Hb_2 and chol = chol_1 and HDL = HDL_2                 | Normal     | 5.26        | 80.00          |
| 345  | Hb = Hb_2 and RBC = RBC_2 and chol = chol_1 and TG = TG_1                   | Normal     | 5.26        | 80.00          |
| 346  | Hct = Hct_2 and LDL = LDL_1 and RBC = RBC_2 and chol = chol_1 and TG = TG_1 | Normal     | 5.26        | 80.00          |
| 347  | chol = chol_3 and Hct = Hct_4                                               | Normal     | 7.37        | 78.57          |
| 348  | Hct = Hct_2 and Hb = Hb_2 and WBC = WBC_1                                   | Normal     | 7.37        | 78.57          |
| 349  | Hct = Hct_2 and WBC = WBC_1 and HDL = HDL_2                                 | Normal     | 7.37        | 78.57          |
| 350  | RBC = RBC_1 and WBC = WBC_1 and HDL = HDL_2                                 | Normal     | 7.37        | 78.57          |
| 351  | Hct = Hct_2 and Hb = Hb_2 and WBC = WBC_1 and TG = TG_1                     | Normal     | 7.37        | 78.57          |
| 352  | Hct = Hct_2 and LDL = LDL_1 and HDL = HDL_2 and TG = TG_1                   | Normal     | 7.37        | 78.57          |
| 353  | RBC = RBC_1 and WBC = WBC_1 and HDL = HDL_2 and TG = TG_1                   | Normal     | 7.37        | 78.57          |
| 354  | Hct = Hct_2 and LDL = LDL_1 and chol = chol_1 and HDL = HDL_2 and TG = TG_1 | Normal     | 7.37        | 78.57          |
| 355  | RBC = RBC_4 and chol = chol_2                                               | Normal     | 6.84        | 76.92          |
| 356  | WBC = WBC_3 and chol = chol_2                                               | Normal     | 6.84        | 76.92          |
| 357  | chol = chol_3 and Hct = Hct_4 and Hb = Hb_4                                 | Normal     | 6.84        | 76.92          |
| 358  | Hct = Hct_3 and chol = chol_2 and TG = TG_1                                 | Normal     | 6.84        | 76.92          |
| 359  | Hct = Hct_2 and WBC = WBC_1 and HDL = HDL_2 and TG = TG_1                   | Normal     | 6.84        | 76.92          |
| 360  | Hct = Hct_2 and WBC = WBC_1                                                 | Normal     | 8.95        | 76.47          |
| 361  | Hb = Hb_2 and chol = chol_1 and HDL = HDL_2 and TG = TG_1                   | Normal     | 8.95        | 76.47          |
| 362  | LDL = LDL_4 and Hb = Hb_4                                                   | Normal     | 6.32        | 75.00          |

| Rule | Antecedent                                                                | Consequent | Support (%) | Confidence (%) |
|------|---------------------------------------------------------------------------|------------|-------------|----------------|
| 363  | Hct = Hct_1 and WBC = WBC_1                                               | Normal     | 6.32        | 75.00          |
| 364  | chol = chol_3 and Hct = Hct_4 and HDL = HDL_2                             | Normal     | 6.32        | 75.00          |
| 365  | Hct = Hct_1 and WBC = WBC_1 and TG = TG_1                                 | Normal     | 6.32        | 75.00          |
| 366  | Hct = Hct_2 and Hb = Hb_2 and LDL = LDL_1                                 | Normal     | 6.32        | 75.00          |
| 367  | Hct = Hct_2 and WBC = WBC_1 and TG = TG_1                                 | Normal     | 8.42        | 75.00          |
| 368  | Hct = Hct_2 and LDL = LDL_1 and HDL = HDL_2                               | Normal     | 8.42        | 75.00          |
| 369  | Hb = Hb_1 and LDL = LDL_2 and chol = chol_1                               | Normal     | 6.32        | 75.00          |
| 370  | Hb = Hb_2 and chol = chol_1 and HDL = HDL_2                               | Normal     | 10.53       | 75.00          |
| 371  | Hct = Hct_2 and Hb = Hb_2 and LDL = LDL_1 and chol = chol_1               | Normal     | 6.32        | 75.00          |
| 372  | Hct = Hct_2 and Hb = Hb_2 and RBC = RBC_2 and TG = TG_1                   | Normal     | 8.42        | 75.00          |
| 373  | Hct = Hct_2 and LDL = LDL_1 and chol = chol_1 and HDL = HDL_2             | Normal     | 8.42        | 75.00          |
| 374  | Hb = Hb_2 and HDL = HDL_2                                                 | Normal     | 20.00       | 73.68          |
| 375  | Hb = Hb_2 and RBC = RBC_2 and TG = TG_1                                   | Normal     | 10.00       | 73.68          |
| 376  | Hb = Hb_1 and LDL = LDL_2                                                 | Normal     | 7.89        | 73.33          |
| 377  | RBC = RBC_1 and WBC = WBC_1                                               | Normal     | 7.89        | 73.33          |
| 378  | RBC = RBC_1 and Hb = Hb_2 and HDL = HDL_2                                 | Normal     | 7.89        | 73.33          |
| 379  | RBC = RBC_1 and WBC = WBC_1 and TG = TG_1                                 | Normal     | 7.89        | 73.33          |
| 380  | WBC = WBC_1 and RBC = RBC_2 and TG = TG_1                                 | Normal     | 7.89        | 73.33          |
| 381  | RBC = RBC_4 and LDL = LDL_3                                               | Normal     | 5.79        | 72.73          |
| 382  | RBC = RBC_4 and Hb = Hb_3                                                 | Normal     | 5.79        | 72.73          |
| 383  | RBC = RBC_4 and chol = chol_2 and TG = TG_1                               | Normal     | 5.79        | 72.73          |
| 384  | LDL = LDL_3 and Hb = Hb_4 and TG = TG_1                                   | Normal     | 5.79        | 72.73          |
| 385  | Hb = Hb_3 and WBC = WBC_1 and HDL = HDL_2                                 | Normal     | 5.79        | 72.73          |
| 386  | Hct = Hct_4 and Hb = Hb_4 and WBC = WBC_3                                 | Normal     | 5.79        | 72.73          |
| 387  | Hct = Hct_4 and WBC = WBC_3 and TG = TG_1                                 | Normal     | 5.79        | 72.73          |
| 388  | WBC = WBC_2 and Hb = Hb_2 and HDL = HDL_2                                 | Normal     | 5.79        | 72.73          |
| 389  | Hct = Hct_1 and Hb = Hb_1 and WBC = WBC_1                                 | Normal     | 5.79        | 72.73          |
| 390  | Hct = Hct_1 and WBC = WBC_1 and HDL = HDL_2                               | Normal     | 5.79        | 72.73          |
| 391  | Hct = Hct_2 and LDL = LDL_1 and RBC = RBC_2                               | Normal     | 5.79        | 72.73          |
| 392  | Hb = Hb_2 and chol = chol_1 and TG = TG_1                                 | Normal     | 11.58       | 72.73          |
| 393  | chol = chol_3 and Hct = Hct_4 and Hb = Hb_4 and HDL = HDL_2               | Normal     | 5.79        | 72.73          |
| 394  | Hb = Hb_3 and WBC = WBC_1 and HDL = HDL_2 and TG = TG_1                   | Normal     | 5.79        | 72.73          |
| 395  | Hct = Hct_3 and chol = chol_2 and HDL = HDL_2 and TG = TG_1               | Normal     | 5.79        | 72.73          |
| 396  | Hct = Hct_1 and Hb = Hb_1 and WBC = WBC_1 and TG = TG_1                   | Normal     | 5.79        | 72.73          |
| 397  | Hct = Hct_1 and WBC = WBC_1 and HDL = HDL_2 and TG = TG_1                 | Normal     | 5.79        | 72.73          |
| 398  | Hct = Hct_2 and LDL = LDL_1 and RBC = RBC_2 and chol = chol_1             | Normal     | 5.79        | 72.73          |
| 399  | chol = chol_3 and Hb = Hb_4                                               | Normal     | 7.37        | 71.43          |
| 400  | LDL = LDL_3 and Hct = Hct_3                                               | Normal     | 7.37        | 71.43          |
| 401  | Hb = Hb_3 and WBC = WBC_1                                                 | Normal     | 7.37        | 71.43          |
| 402  | RBC = RBC_3 and chol = chol_2 and TG = TG_1                               | Normal     | 7.37        | 71.43          |
| 403  | Hct = Hct_2 and Hb = Hb_2 and chol = chol_1 and HDL = HDL_2 and TG = TG_1 | Normal     | 7.37        | 71.43          |
| 404  | Hb = Hb_2 and TG = TG_1                                                   | Normal     | 20.00       | 71.05          |
| 405  | Hb = Hb_2 and HDL = HDL_2 and TG = TG_1                                   | Normal     | 16.32       | 70.97          |
| 406  | RBC = RBC_1 and LDL = LDL_1 and HDL = HDL_2                               | Normal     | 8.95        | 70.59          |

| Rule | Antecedent                                                    | Consequent | Support (%) | Confidence (%) |
|------|---------------------------------------------------------------|------------|-------------|----------------|
| 407  | Hct = Hct_2 and Hb = Hb_2 and chol = chol_1 and TG = TG_1     | Normal     | 8.95        | 70.59          |
| 408  | RBC = RBC_1 and LDL = LDL_1 and chol = chol_1 and HDL = HDL_2 | Normal     | 8.95        | 70.59          |
| 409  | LDL = LDL_4                                                   | Normal     | 14.21       | 70.37          |
| 410  | chol = chol_3 and HDL = HDL_2                                 | Normal     | 14.21       | 70.37          |
| 411  | chol = chol_3                                                 | Normal     | 15.79       | 70.00          |

**Table S2:** Association rules for Pre-DM group

| Rule | Antecedent                                                       | Consequent | Support (%) | Confidence (%) |
|------|------------------------------------------------------------------|------------|-------------|----------------|
| 1    | WBC = WBC_1 and glucose = gluc_2                                 | Pre-DM     | 6.84        | 100.00         |
| 2    | WBC = WBC_1 and glucose = gluc_2 and chol = chol_1               | Pre-DM     | 5.26        | 100.00         |
| 3    | WBC = WBC_1 and glucose = gluc_2 and chol = chol_1 and TG = TG_1 | Pre-DM     | 5.26        | 100.00         |
| 4    | WBC = WBC_1 and glucose = gluc_2 and HDL = HDL_2                 | Pre-DM     | 5.79        | 100.00         |
| 5    | WBC = WBC_1 and glucose = gluc_2 and HDL = HDL_2 and TG = TG_1   | Pre-DM     | 5.26        | 100.00         |
| 6    | WBC = WBC_1 and glucose = gluc_2 and TG = TG_1                   | Pre-DM     | 6.32        | 100.00         |
| 7    | WBC = WBC_2 and glucose = gluc_2                                 | Pre-DM     | 7.89        | 100.00         |
| 8    | WBC = WBC_2 and glucose = gluc_2 and HDL = HDL_2                 | Pre-DM     | 6.84        | 100.00         |
| 9    | WBC = WBC_2 and glucose = gluc_2 and HDL = HDL_2 and TG = TG_1   | Pre-DM     | 5.26        | 100.00         |
| 10   | WBC = WBC_2 and glucose = gluc_2 and TG = TG_1                   | Pre-DM     | 5.78        | 100.00         |
| 11   | WBC = WBC_3 and glucose = gluc_2                                 | Pre-DM     | 8.42        | 100.00         |
| 12   | WBC = WBC_3 and glucose = gluc_2 and chol = chol_1               | Pre-DM     | 6.32        | 100.00         |
| 13   | WBC = WBC_3 and glucose = gluc_2 and HDL = HDL_2                 | Pre-DM     | 5.79        | 100.00         |
| 14   | WBC = WBC_3 and glucose = gluc_2 and HDL = HDL_2 and TG = TG_1   | Pre-DM     | 5.26        | 100.00         |
| 15   | WBC = WBC_3 and glucose = gluc_2 and TG = TG_1                   | Pre-DM     | 6.32        | 100.00         |
| 16   | WBC = WBC_4 and glucose = gluc_2                                 | Pre-DM     | 7.89        | 100.00         |
| 17   | WBC = WBC_4 and glucose = gluc_2 and TG = TG_1                   | Pre-DM     | 5.79        | 100.00         |
| 18   | Hb = Hb_1 and glucose = gluc_2                                   | Pre-DM     | 7.37        | 100.00         |
| 19   | Hb = Hb_1 and glucose = gluc_2 and chol = chol_1                 | Pre-DM     | 5.79        | 100.00         |
| 20   | Hb = Hb_1 and glucose = gluc_2 and HDL = HDL_2                   | Pre-DM     | 5.79        | 100.00         |
| 21   | Hb = Hb_1 and glucose = gluc_2 and HDL = HDL_2 and TG = TG_1     | Pre-DM     | 5.26        | 100.00         |
| 22   | Hb = Hb_1 and glucose = gluc_2 and TG = TG_1                     | Pre-DM     | 6.32        | 100.00         |
| 23   | Hb = Hb_1 and RBC = RBC_1 and glucose = gluc_2                   | Pre-DM     | 5.26        | 100.00         |
| 24   | Hb = Hb_2 and glucose = gluc_2                                   | Pre-DM     | 6.32        | 100.00         |
| 25   | Hb = Hb_3 and glucose = gluc_2                                   | Pre-DM     | 7.89        | 100.00         |
| 26   | Hb = Hb_3 and glucose = gluc_2 and chol = chol_1                 | Pre-DM     | 5.26        | 100.00         |
| 27   | Hb = Hb_3 and glucose = gluc_2 and HDL = HDL_2                   | Pre-DM     | 5.26        | 100.00         |
| 28   | Hb = Hb_3 and glucose = gluc_2 and TG = TG_1                     | Pre-DM     | 5.79        | 100.00         |
| 29   | Hb = Hb_3 and Hct = Hct_3 and glucose = gluc_2                   | Pre-DM     | 5.79        | 100.00         |
| 30   | Hb = Hb_4 and glucose = gluc_2                                   | Pre-DM     | 9.47        | 100.00         |
| 31   | Hb = Hb_4 and glucose = gluc_2 and HDL = HDL_2                   | Pre-DM     | 7.89        | 100.00         |
| 32   | Hb = Hb_4 and glucose = gluc_2 and HDL = HDL_2 and TG = TG_1     | Pre-DM     | 6.32        | 100.00         |
| 33   | Hb = Hb_4 and glucose = gluc_2 and TG = TG_1                     | Pre-DM     | 7.89        | 100.00         |

| Rule | Antecedent                                                                       | Consequent | Support (%) | Confidence (%) |
|------|----------------------------------------------------------------------------------|------------|-------------|----------------|
| 34   | Hct = Hct_1 and Hb = Hb_1 and glucose = gluc_2                                   | Pre-DM     | 6.84        | 100.00         |
| 35   | Hct = Hct_1 and Hb = Hb_1 and glucose = gluc_2 and chol = chol_1                 | Pre-DM     | 5.26        | 100.00         |
| 36   | Hct = Hct_1 and Hb = Hb_1 and glucose = gluc_2 and HDL = HDL_2                   | Pre-DM     | 5.26        | 100.00         |
| 37   | Hct = Hct_1 and Hb = Hb_1 and glucose = gluc_2 and TG = TG_1                     | Pre-DM     | 5.79        | 100.00         |
| 38   | Hct = Hct_1 and Hb = Hb_1 and RBC = RBC_1 and glucose = gluc_2                   | Pre-DM     | 5.26        | 100.00         |
| 39   | Hct = Hct_4 and Hb = Hb_4 and glucose = gluc_2                                   | Pre-DM     | 8.42        | 100.00         |
| 40   | Hct = Hct_4 and Hb = Hb_4 and glucose = gluc_2 and HDL = HDL_2                   | Pre-DM     | 6.84        | 100.00         |
| 41   | Hct = Hct_4 and Hb = Hb_4 and glucose = gluc_2 and HDL = HDL_2 and TG = TG_1     | Pre-DM     | 6.32        | 100.00         |
| 42   | Hct = Hct_4 and Hb = Hb_4 and glucose = gluc_2 and TG = TG_1                     | Pre-DM     | 7.89        | 100.00         |
| 43   | Hct = Hct_1 and glucose = gluc_2                                                 | Pre-DM     | 7.37        | 100.00         |
| 44   | Hct = Hct_1 and glucose = gluc_2 and chol = chol_1                               | Pre-DM     | 5.79        | 100.00         |
| 45   | Hct = Hct_1 and glucose = gluc_2 and HDL = HDL_2                                 | Pre-DM     | 5.26        | 100.00         |
| 46   | Hct = Hct_1 and glucose = gluc_2 and TG = TG_1                                   | Pre-DM     | 5.79        | 100.00         |
| 47   | Hct = Hct_1 and RBC = RBC_1 and glucose = gluc_2                                 | Pre-DM     | 5.26        | 100.00         |
| 48   | Hct = Hct_2 and glucose = gluc_2                                                 | Pre-DM     | 5.79        | 100.00         |
| 49   | Hct = Hct_2 and glucose = gluc_2 and HDL = HDL_2                                 | Pre-DM     | 5.26        | 100.00         |
| 50   | Hct = Hct_2 and glucose = gluc_2 and TG = TG_1                                   | Pre-DM     | 5.26        | 100.00         |
| 51   | Hct = Hct_3 and glucose = gluc_2                                                 | Pre-DM     | 8.95        | 100.00         |
| 52   | Hct = Hct_3 and glucose = gluc_2 and HDL = HDL_2                                 | Pre-DM     | 5.26        | 100.00         |
| 53   | Hct = Hct_3 and glucose = gluc_2 and TG = TG_1                                   | Pre-DM     | 5.26        | 100.00         |
| 54   | Hct = Hct_4 and glucose = gluc_2                                                 | Pre-DM     | 8.95        | 100.00         |
| 55   | Hct = Hct_4 and glucose = gluc_2 and HDL = HDL_2                                 | Pre-DM     | 6.84        | 100.00         |
| 56   | Hct = Hct_4 and glucose = gluc_2 and HDL = HDL_2 and TG = TG_1                   | Pre-DM     | 6.32        | 100.00         |
| 57   | Hct = Hct_4 and glucose = gluc_2 and TG = TG_1                                   | Pre-DM     | 7.89        | 100.00         |
| 58   | RBC = RBC_1 and glucose = gluc_2                                                 | Pre-DM     | 8.42        | 100.00         |
| 59   | RBC = RBC_1 and glucose = gluc_2 and chol = chol_1                               | Pre-DM     | 5.26        | 100.00         |
| 60   | RBC = RBC_1 and glucose = gluc_2 and HDL = HDL_2                                 | Pre-DM     | 6.32        | 100.00         |
| 61   | RBC = RBC_1 and glucose = gluc_2 and HDL = HDL_2 and TG = TG_1                   | Pre-DM     | 6.32        | 100.00         |
| 62   | RBC = RBC_1 and glucose = gluc_2 and TG = TG_1                                   | Pre-DM     | 7.89        | 100.00         |
| 63   | RBC = RBC_3 and glucose = gluc_2                                                 | Pre-DM     | 7.89        | 100.00         |
| 64   | RBC = RBC_3 and glucose = gluc_2 and TG = TG_1                                   | Pre-DM     | 5.79        | 100.00         |
| 65   | glucose = gluc_2 and RBC = RBC_2                                                 | Pre-DM     | 10.00       | 100.00         |
| 66   | glucose = gluc_2 and RBC = RBC_2 and chol = chol_1                               | Pre-DM     | 6.32        | 100.00         |
| 67   | glucose = gluc_2 and RBC = RBC_2 and chol = chol_1 and HDL = HDL_2               | Pre-DM     | 5.79        | 100.00         |
| 68   | glucose = gluc_2 and RBC = RBC_2 and chol = chol_1 and HDL = HDL_2 and TG = TG_1 | Pre-DM     | 5.26        | 100.00         |
| 69   | glucose = gluc_2 and RBC = RBC_2 and chol = chol_1 and TG = TG_1                 | Pre-DM     | 5.26        | 100.00         |
| 70   | glucose = gluc_2 and RBC = RBC_2 and HDL = HDL_2                                 | Pre-DM     | 9.47        | 100.00         |
| 71   | glucose = gluc_2 and RBC = RBC_2 and HDL = HDL_2 and TG = TG_1                   | Pre-DM     | 7.37        | 100.00         |
| 72   | glucose = gluc_2 and RBC = RBC_2 and sex = M                                     | Pre-DM     | 5.79        | 100.00         |
| 73   | glucose = gluc_2 and RBC = RBC_2 and sex = M and HDL = HDL_2                     | Pre-DM     | 5.79        | 100.00         |
| 74   | glucose = gluc_2 and RBC = RBC_2 and TG = TG_1                                   | Pre-DM     | 7.37        | 100.00         |
| 75   | LDL = LDL_1 and glucose = gluc_2                                                 | Pre-DM     | 10.53       | 100.00         |
| 76   | LDL = LDL_1 and glucose = gluc_2 and chol = chol_1                               | Pre-DM     | 10.53       | 100.00         |
| 77   | LDL = LDL_1 and glucose = gluc_2 and chol = chol_1 and HDL = HDL_2               | Pre-DM     | 7.89        | 100.00         |

| Rule | Antecedent                                                                       | Consequent | Support (%) | Confidence (%) |
|------|----------------------------------------------------------------------------------|------------|-------------|----------------|
| 78   | LDL = LDL_1 and glucose = gluc_2 and chol = chol_1 and HDL = HDL_2 and TG = TG_1 | Pre-DM     | 6.84        | 100.00         |
| 79   | LDL = LDL_1 and glucose = gluc_2 and chol = chol_1 and TG = TG_1                 | Pre-DM     | 8.95        | 100.00         |
| 80   | LDL = LDL_1 and glucose = gluc_2 and HDL = HDL_2                                 | Pre-DM     | 7.89        | 100.00         |
| 81   | LDL = LDL_1 and glucose = gluc_2 and HDL = HDL_2 and TG = TG_1                   | Pre-DM     | 6.84        | 100.00         |
| 82   | LDL = LDL_1 and glucose = gluc_2 and sex = M                                     | Pre-DM     | 5.79        | 100.00         |
| 83   | LDL = LDL_1 and glucose = gluc_2 and sex = M and chol = chol_1                   | Pre-DM     | 5.79        | 100.00         |
| 84   | LDL = LDL_1 and glucose = gluc_2 and TG = TG_1                                   | Pre-DM     | 8.95        | 100.00         |
| 85   | LDL = LDL_3 and glucose = gluc_2                                                 | Pre-DM     | 5.79        | 100.00         |
| 86   | chol = chol_2 and glucose = gluc_2                                               | Pre-DM     | 8.42        | 100.00         |
| 87   | chol = chol_2 and glucose = gluc_2 and HDL = HDL_2                               | Pre-DM     | 6.84        | 100.00         |
| 88   | chol = chol_2 and glucose = gluc_2 and HDL = HDL_2 and TG = TG_1                 | Pre-DM     | 5.26        | 100.00         |
| 89   | chol = chol_2 and glucose = gluc_2 and TG = TG_1                                 | Pre-DM     | 6.32        | 100.00         |
| 90   | glucose = gluc_2                                                                 | Pre-DM     | 31.05       | 100.00         |
| 91   | glucose = gluc_2 and chol = chol_1                                               | Pre-DM     | 19.47       | 100.00         |
| 92   | glucose = gluc_2 and chol = chol_1 and HDL = HDL_2                               | Pre-DM     | 12.63       | 100.00         |
| 93   | glucose = gluc_2 and chol = chol_1 and HDL = HDL_2 and TG = TG_1                 | Pre-DM     | 11.58       | 100.00         |
| 94   | glucose = gluc_2 and chol = chol_1 and TG = TG_1                                 | Pre-DM     | 15.26       | 100.00         |
| 95   | glucose = gluc_2 and HDL = HDL_2                                                 | Pre-DM     | 22.63       | 100.00         |
| 96   | glucose = gluc_2 and HDL = HDL_2 and TG = TG_1                                   | Pre-DM     | 19.47       | 100.00         |
| 97   | glucose = gluc_2 and LDL = LDL_2                                                 | Pre-DM     | 11.58       | 100.00         |
| 98   | glucose = gluc_2 and LDL = LDL_2 and chol = chol_1                               | Pre-DM     | 7.89        | 100.00         |
| 99   | glucose = gluc_2 and LDL = LDL_2 and chol = chol_1 and TG = TG_1                 | Pre-DM     | 5.26        | 100.00         |
| 100  | glucose = gluc_2 and LDL = LDL_2 and HDL = HDL_2                                 | Pre-DM     | 7.89        | 100.00         |
| 101  | glucose = gluc_2 and LDL = LDL_2 and HDL = HDL_2 and TG = TG_1                   | Pre-DM     | 7.37        | 100.00         |
| 102  | glucose = gluc_2 and LDL = LDL_2 and TG = TG_1                                   | Pre-DM     | 8.42        | 100.00         |
| 103  | glucose = gluc_2 and sex = M                                                     | Pre-DM     | 14.21       | 100.00         |
| 104  | glucose = gluc_2 and sex = M and chol = chol_1                                   | Pre-DM     | 10.53       | 100.00         |
| 105  | glucose = gluc_2 and sex = M and chol = chol_1 and HDL = HDL_2                   | Pre-DM     | 7.37        | 100.00         |
| 106  | glucose = gluc_2 and sex = M and chol = chol_1 and HDL = HDL_2 and TG = TG_1     | Pre-DM     | 6.32        | 100.00         |
| 107  | glucose = gluc_2 and sex = M and chol = chol_1 and TG = TG_1                     | Pre-DM     | 7.37        | 100.00         |
| 108  | glucose = gluc_2 and sex = M and HDL = HDL_2                                     | Pre-DM     | 10.53       | 100.00         |
| 109  | glucose = gluc_2 and sex = M and HDL = HDL_2 and TG = TG_1                       | Pre-DM     | 8.95        | 100.00         |
| 110  | glucose = gluc_2 and sex = M and TG = TG_1                                       | Pre-DM     | 10.53       | 100.00         |
| 111  | glucose = gluc_2 and TG = TG_1                                                   | Pre-DM     | 24.21       | 100.00         |

**Table S3:** Association rules for DM group

| Rule | Antecedent                                         | Consequent | Support % | Confidence % |
|------|----------------------------------------------------|------------|-----------|--------------|
| 1    | glucose = gluc_3                                   | DM         | 12.63     | 100.00       |
| 2    | glucose = gluc_3 and Hb = Hb_1                     | DM         | 5.79      | 100.00       |
| 3    | glucose = gluc_3 and LDL = LDL_1                   | DM         | 5.79      | 100.00       |
| 4    | glucose = gluc_3 and sex = M                       | DM         | 5.79      | 100.00       |
| 5    | glucose = gluc_3 and chol = chol_1                 | DM         | 8.42      | 100.00       |
| 6    | glucose = gluc_3 and HDL = HDL_2                   | DM         | 6.84      | 100.00       |
| 7    | glucose = gluc_3 and TG = TG_1                     | DM         | 8.95      | 100.00       |
| 8    | glucose = gluc_3 and LDL = LDL_1 and chol = chol_1 | DM         | 5.79      | 100.00       |
| 9    | glucose = gluc_3 and sex = M and TG = TG_1         | DM         | 5.26      | 100.00       |
| 10   | glucose = gluc_3 and chol = chol_1 and TG = TG_1   | DM         | 5.79      | 100.00       |
| 11   | glucose = gluc_3 and HDL = HDL_2 and TG = TG_1     | DM         | 6.84      | 100.00       |
